# Supplementary material for: Dementia clinical trials over the past decade: are women fairly represented?
Source: HighWire-hosted journal article supplement (doi:10.1136/bmjno-2021-000261), 2022-09-01
Supplement: bmjno-2021-000261supp001_data_supplement.pdf [file bmjno-2021-000261supp001_data_supplement.pdf]

**Supplementary tables****Table S1: Number of trials by country**

| <b>Country</b>     | <b>Number of trials</b> |
|--------------------|-------------------------|
| Argentina          | 1                       |
| Australia          | 10                      |
| Austria            | 6                       |
| Belgium            | 4                       |
| Brazil             | 11                      |
| Canada             | 64                      |
| China              | 24                      |
| Denmark            | 5                       |
| Egypt              | 3                       |
| Finland            | 4                       |
| France             | 88                      |
| Germany            | 39                      |
| Greece             | 3                       |
| Hong Kong          | 11                      |
| India              | 1                       |
| Iran               | 1                       |
| Ireland            | 1                       |
| Israel             | 8                       |
| Italy              | 17                      |
| Japan              | 18                      |
| Korea (South)      | 28                      |
| Mexico             | 2                       |
| Netherlands        | 12                      |
| New Zealand        | 1                       |
| Nigeria            | 1                       |
| Norway             | 23                      |
| Pakistan           | 1                       |
| Poland             | 1                       |
| Portugal           | 5                       |
| Russian Federation | 2                       |
| Singapore          | 5                       |
| Slovakia           | 1                       |
| Spain              | 30                      |
| Sweden             | 6                       |
| Switzerland        | 10                      |
| Taiwan             | 28                      |
| Tanzania           | 1                       |
| Thailand           | 1                       |

---

|                       |     |
|-----------------------|-----|
| <b>Turkey</b>         | 6   |
| <b>United Kingdom</b> | 50  |
| <b>USA</b>            | 642 |
| <b>Vietnam</b>        | 1   |
| <b>International</b>  | 175 |

---

**Table S2: Subgroup analysis for participation to prevalence ratio for women (N=113)**

| <b>Variable</b>            | <b>Factors</b>            | <b>PPR with 95% CI</b> |
|----------------------------|---------------------------|------------------------|
| <b>Age</b>                 | <80 years                 | 0.85 [0.80 to 0.89]    |
|                            | ≥80 years                 | 1.01 [0.98 to 1.05]    |
| <b>Intervention</b>        | Drug                      | 0.87 [0.83 to 1.05]    |
|                            | Behavioural               | 0.93 [0.77 to 0.95]    |
|                            | Other                     | 0.95 [0.83 to 1.03]    |
| <b>Dementia type</b>       | Alzheimer's disease       | 0.89 [0.81 to 0.99]    |
|                            | Other                     | 0.90 [0.84 to 0.94]    |
| <b>Severity</b>            | Mild cognitive impairment | 0.96 [0.91 to 1.00]    |
|                            | Dementia                  | 0.88 [0.84 to 0.92]    |
| <b>Continent</b>           | Americas                  | 0.85 [0.78 to 0.92]    |
|                            | Asia                      | 0.97 [0.91 to 1.03]    |
|                            | Europe                    | 0.96 [0.89 to 1.01]    |
|                            | Worldwide                 | 0.88 [0.83 to 0.92]    |
| <b>Funding</b>             | Industry                  | 0.89 [0.84 to 0.93]    |
|                            | Other                     | 0.90 [0.83 to 0.97]    |
| <b>Gender first author</b> | Woman                     | 0.95 [0.70 to 1.20]    |
|                            | Man                       | 0.87 [0.46 to 1.12]    |
| <b>Gender last author</b>  | Woman                     | 0.98 [0.79 to 1.14]    |
|                            | Man                       | 0.88 [0.46 to 1.15]    |

**Figure S1: Number of dementia trials 2010-2021**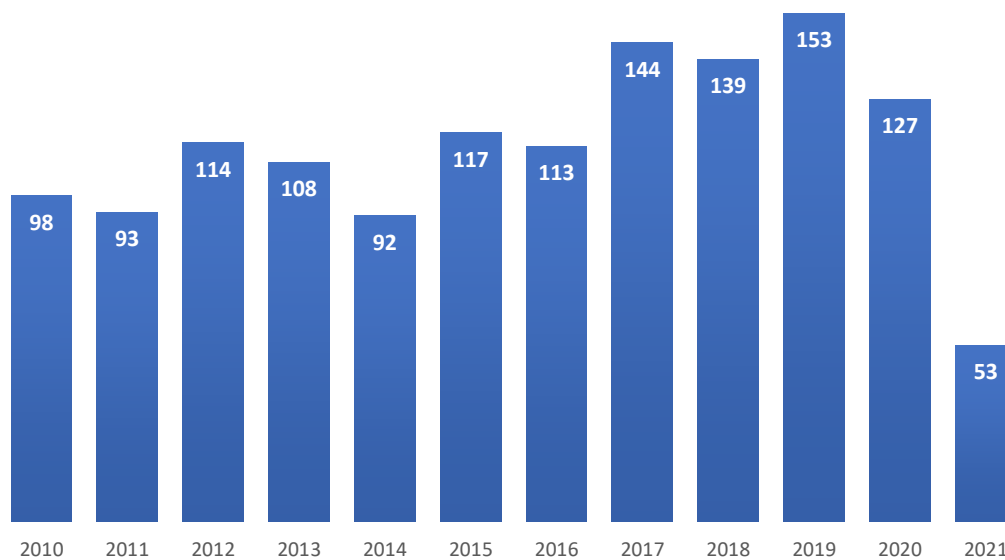

Figure S2: World map displaying the number of trials conducted in each country

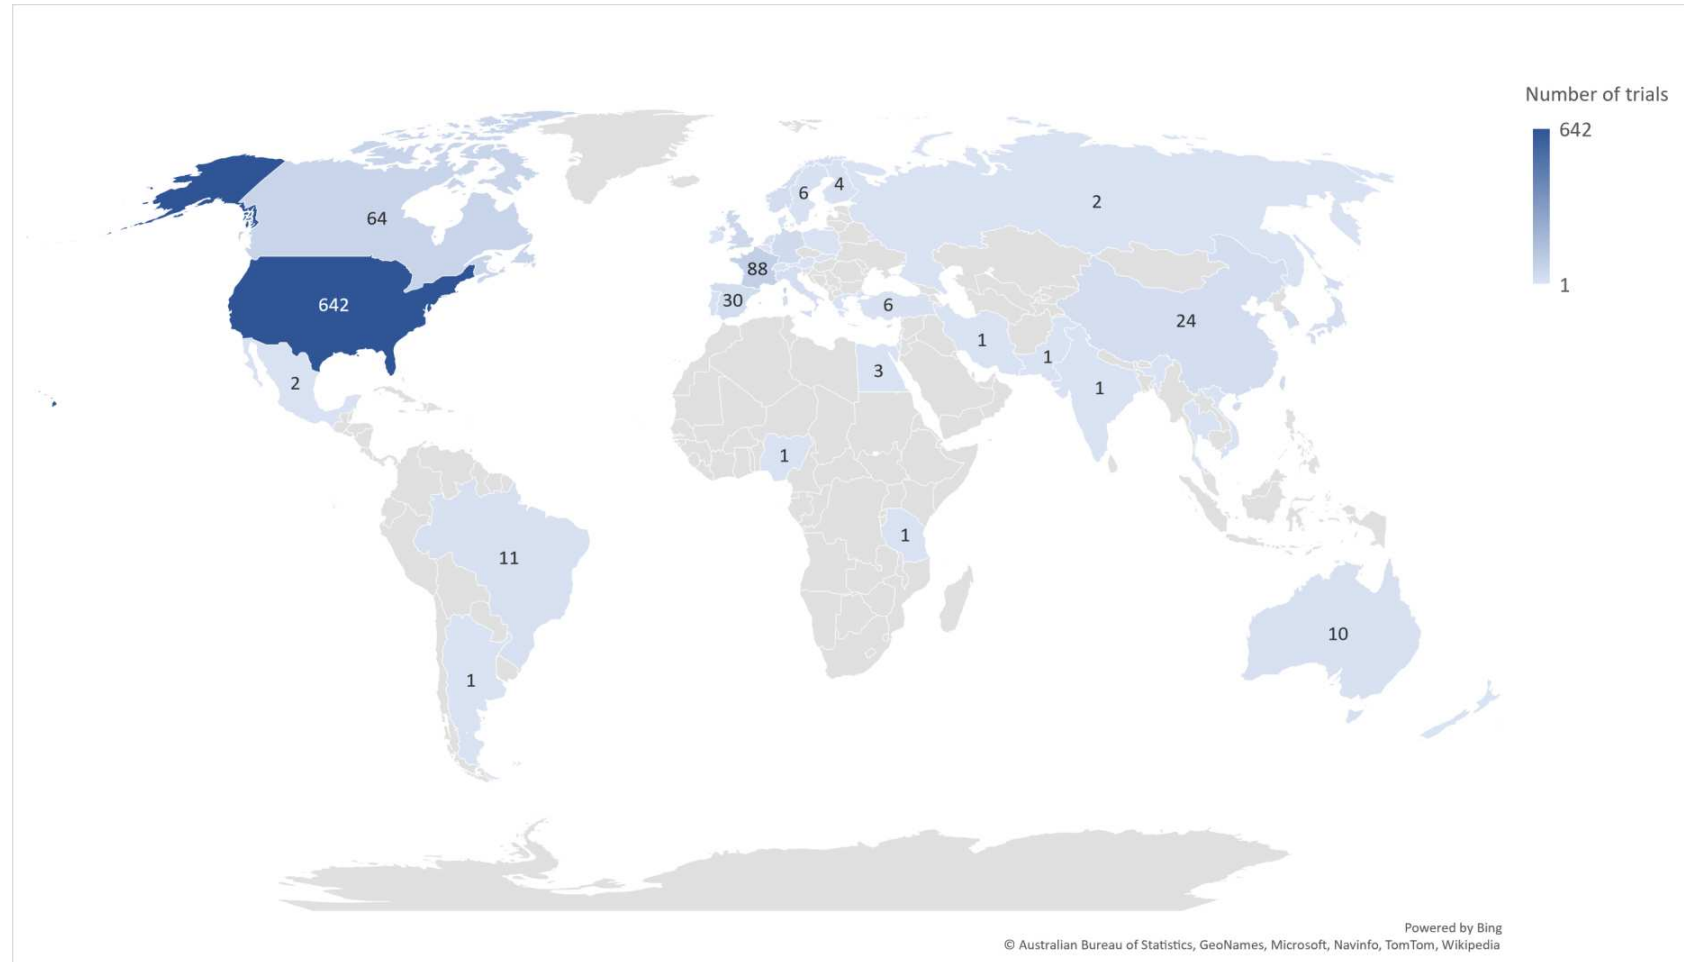

**Figure S3: Subgroup analysis of the distribution of participation to prevalence ratios (PPR)**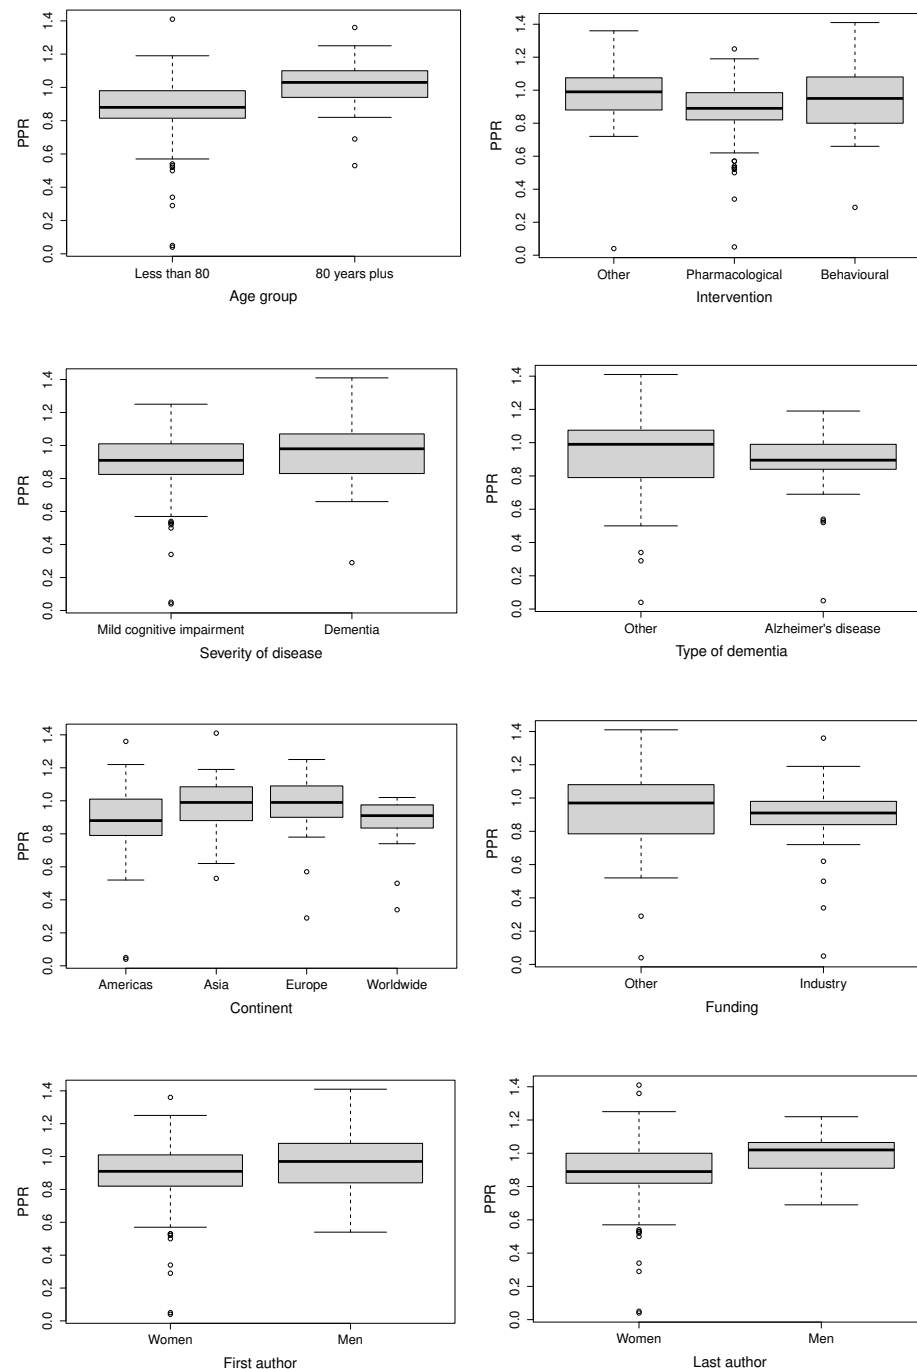

Box and whisker plots represent the distribution of PPR within each category. The thick black horizontal bar represents the median PPR within the category, with the grey box representing the interquartile interval between the first quarter and upper quarter of the dataset. The thin black lines represent “whiskers” that extends to one and a half times the interquartile interval, values beyond are extreme values represented as white dots with black outline.
